# Supplementary material for: Epithelial-Mesenchymal Transition Promotes the Differentiation Potential ofXenopus tropicalisImmature Sertoli Cells
Source: Hindawi journal article supplement (doi:10.1155/2019/8387478), 2019-05-05
Supplement: f1 [file 8387478.f1.pdf]

**Supplementary figure 1**

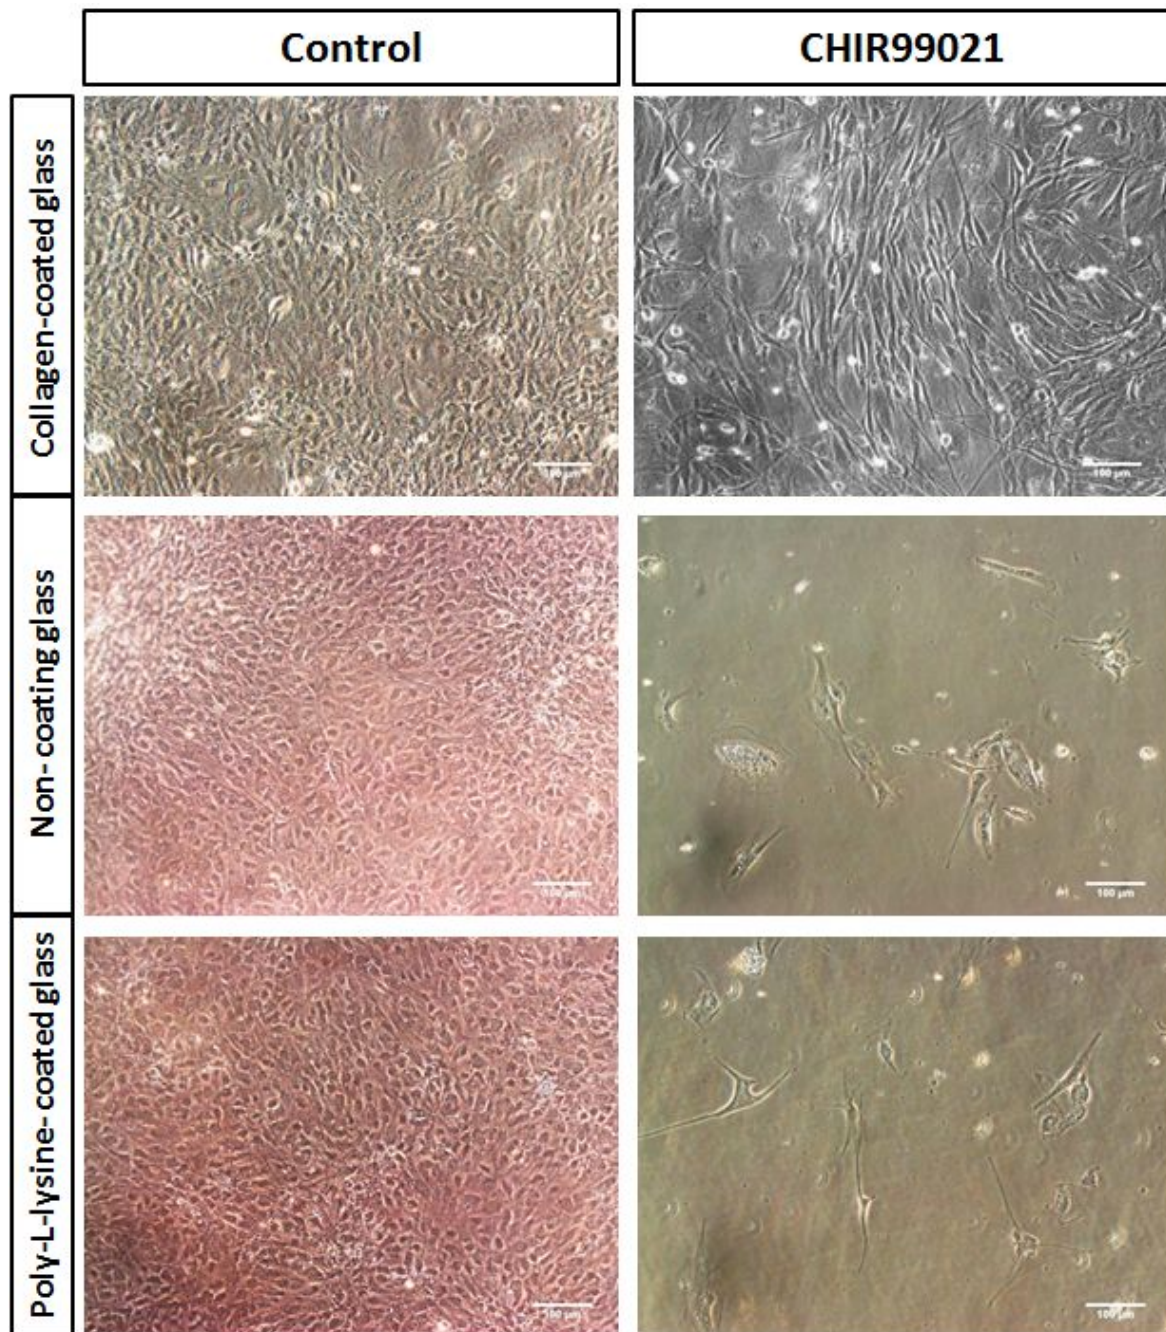

**Supplementary figure 1:** Phase-contrast images of XtiSCs on microscopic glass coated with various materials. CHIR99021- treated XtiSCs were able to grow only on the collagen type I-coated glass, but not on the non coated or poly-L-lysine coated glass. In contrary, cells with 0.1% DMSO (control) were not affected by the coating materials. Scale bar: 100  $\mu\text{m}$ .

## Supplementary figure 2

A.

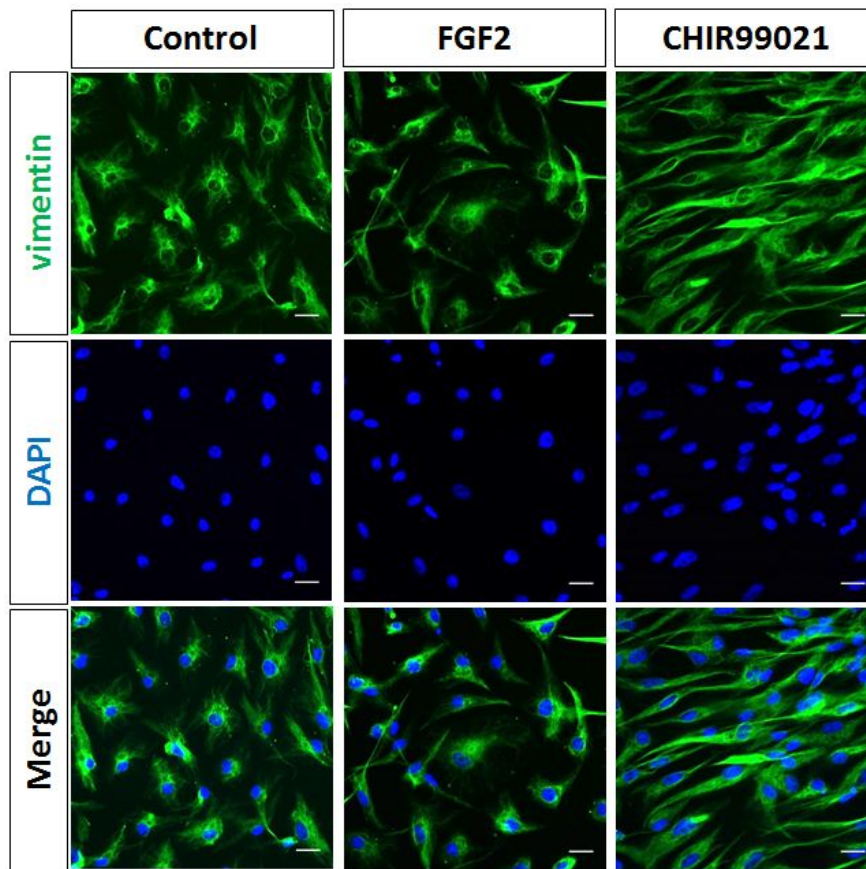

B.

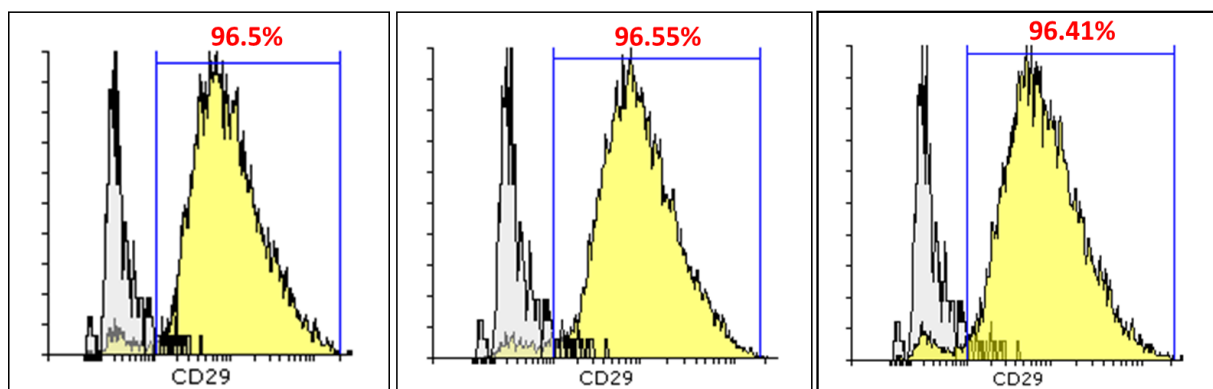

**Supplementary figure 2:** (A) Immunofluorescent images of mesenchymal interfilament (vimentin) in XtiSCs untreated or treated with CHIR99021 or FGF2. (B) Flow cytometry analysis of surface marker CD29, typical for the mesenchymal cells. GSK3 inhibitor has no effect on the expression of both proteins. Scale bar: 20  $\mu$ m.



### Supplementary figure 3

A.

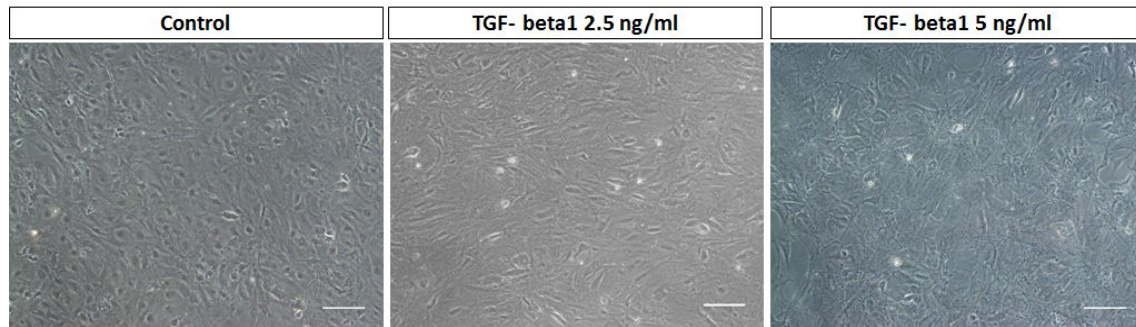

B.

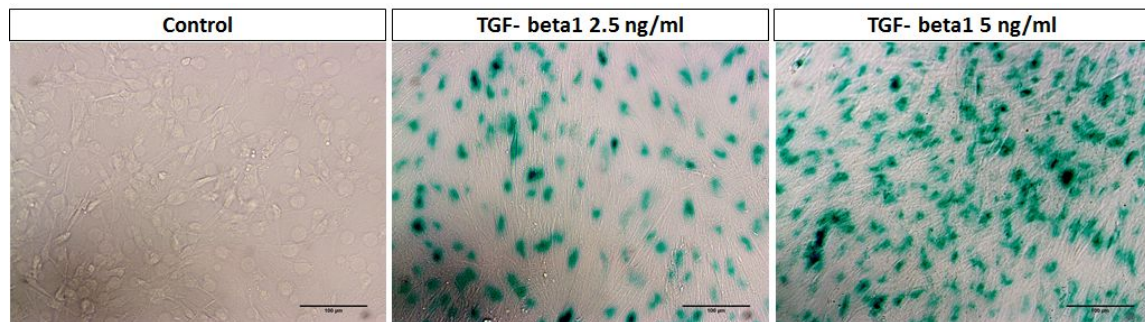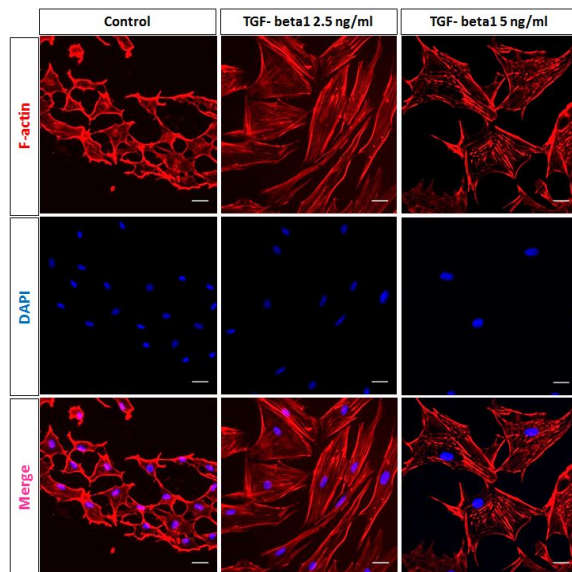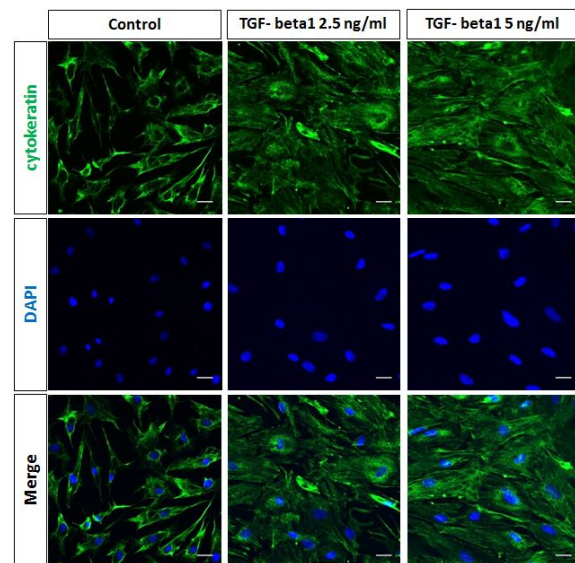

C.

D.

**Supplementary figure 3:** XtiSCs became senescent after 3 days of treatment with TGF- $\beta$ 1. Phase-contrast images (A), X-gal (B) and Phalloidin (F-actin) staining (C) showed the XtiSCs change of shape into bigger and flat cells, and the increase of galactosidase activity, a senescent marker after TGF- $\beta$ 1 treatment. XtiSCs untreated or treated with TGF- $\beta$ 1 still expressed the epithelial intermediate filament, cytokeratin (D). Phase-contrast images with scale bar: 100  $\mu$ m. Nuclei were stained with DAPI. Immunofluorescent images with scale bar: 20  $\mu$ m.

## Supplementary figure 4

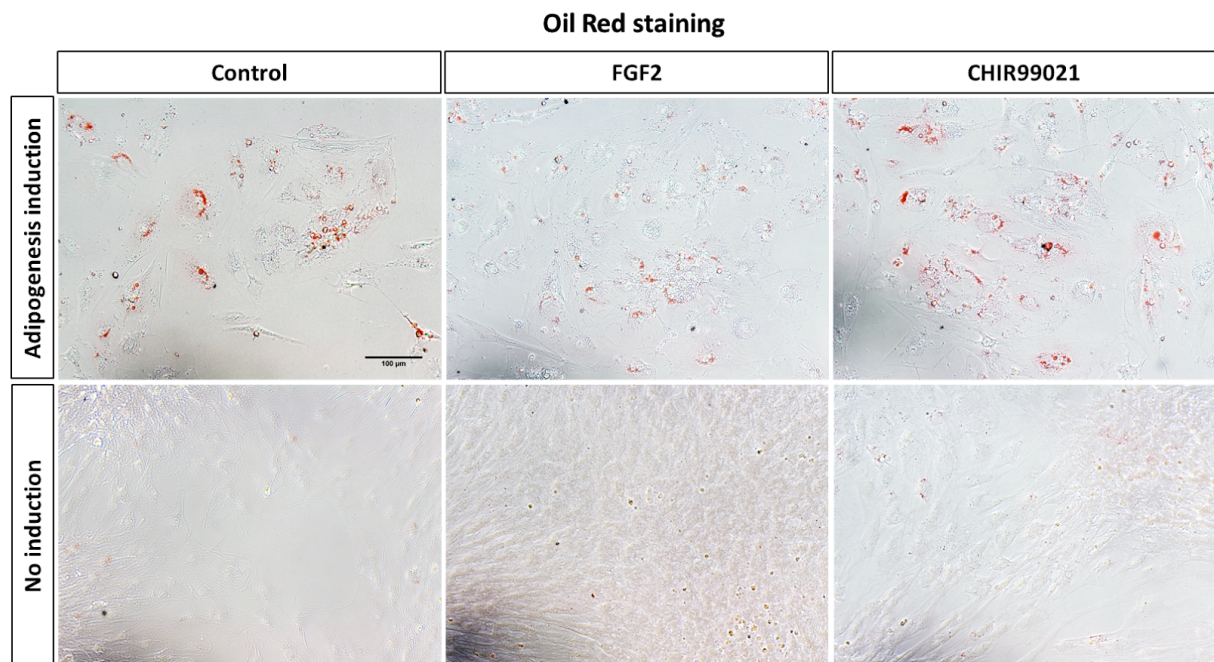

**Supplementary figure 4:** Adipocyte differentiation of XtiSCs as evidenced with oil red staining after 14 days in induction medium. Positive cells containing red oil droplets appeared in all the cell groups. However, the efficiency of adipocyte induction was quite low. Scale bar: 100  $\mu\text{m}$ .

**Supplementary figure 5**

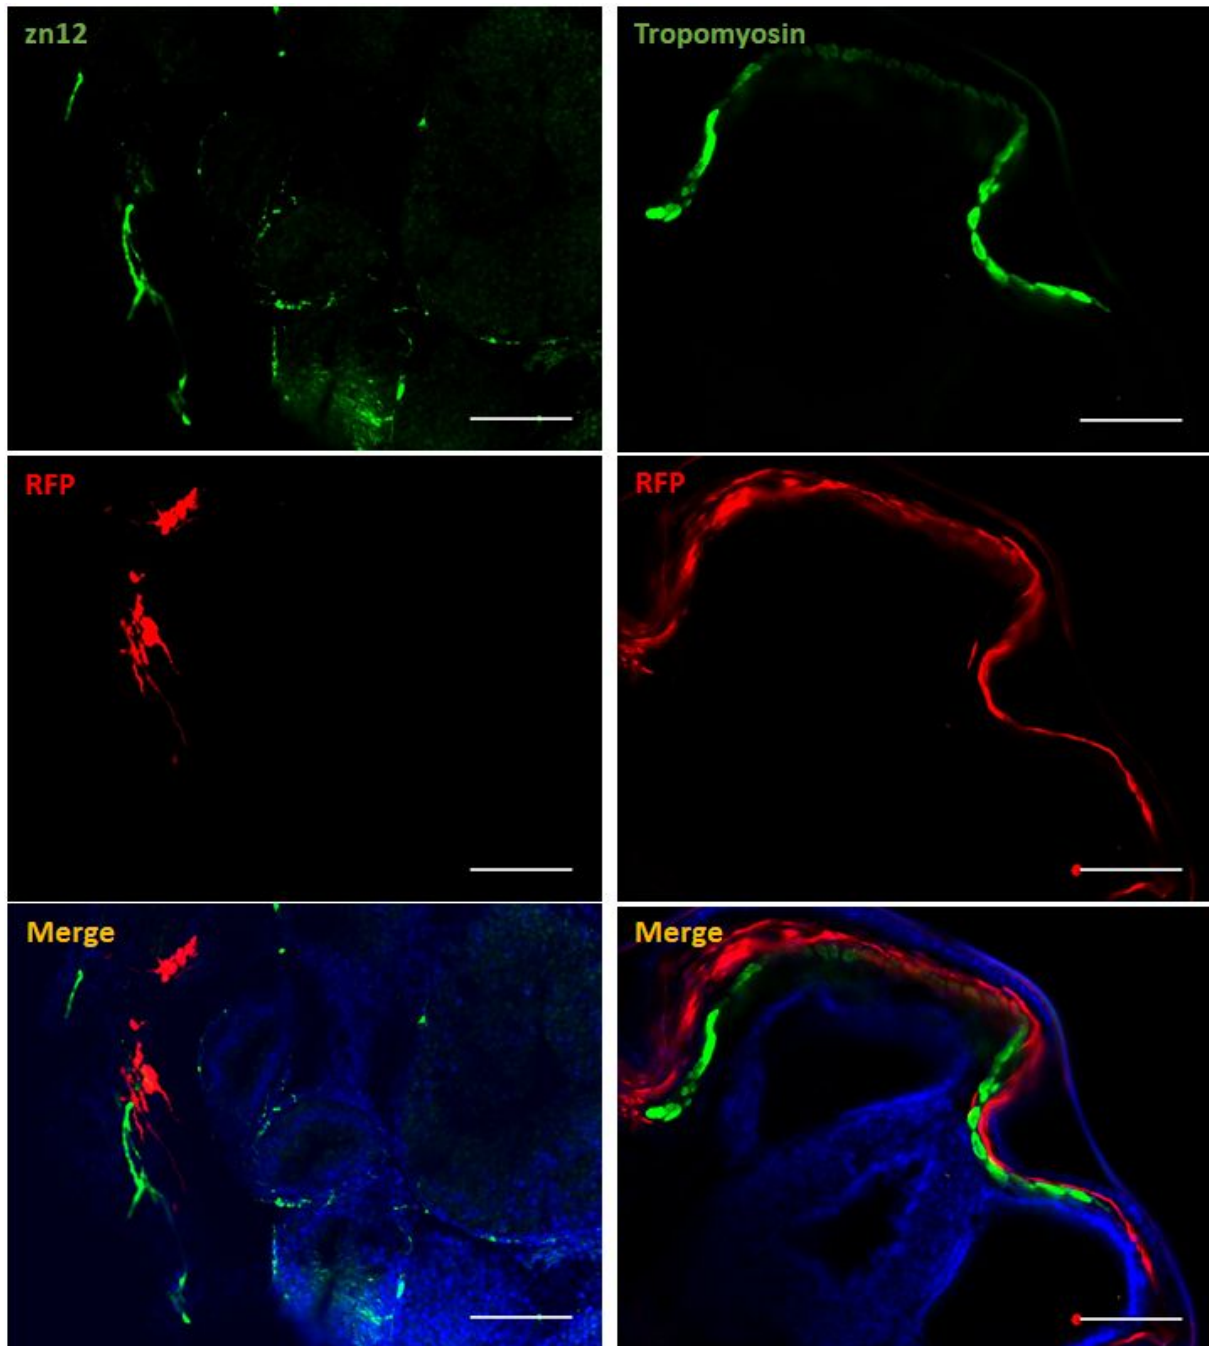

**Supplementary figure 5:** Immunofluorescent images of cross-sections of injected tadpoles with CHIR-treated cells. Double staining of antibodies against neuronal surface marker or tropomyosin (a marker of muscle cells) (mouse, green) and RFP (rabbit, red) were employed on the vibratome sections of transplanted tadpoles after 15 days. Scale bar: 50  $\mu$ m. DAPI (blue) was used for staining cell nuclei.

## Supplementary table 1

### Primer sequences for RT-PCR of *Xenopus tropicalis* transcripts

| Gene symbol   | Gene name                                | Gene transcript    | Primer F                                                 | Size (bp) |
|---------------|------------------------------------------|--------------------|----------------------------------------------------------|-----------|
|               |                                          |                    | Primer R                                                 |           |
| <i>cd44</i>   | CD44 molecule                            | ENSXETT00000016456 | CCC TGG GCA ATA ACG ATT CC<br>ATC GGT GAC CTC TCC TGG AT | 572       |
| <i>twist1</i> | Twist-family bHLH transcription factor 1 | ENSXETT00000054522 | TCTCCCCAGTAGACAGTCTAA<br>AGACCTGGCAGAGAAAGTCG            | 351       |
| <i>actb</i>   | Actin, beta                              | ENSXETT00000006761 | CCAAGCTGTGTTGTCCCTGT<br>GCTGTGGTGGTGAAGCTGTA             | 235       |



**Supplementary table 2: Antibodies used in immunofluorescent staining**

| Antigen                                        | Species | Provider                             | Cat./Clone No.  | Reference/<br>Certificate No.           | Dilution |
|------------------------------------------------|---------|--------------------------------------|-----------------|-----------------------------------------|----------|
| Cytokeratin                                    | Mouse   | Developmental Studies Hybridoma Bank | 1h5             | Klymkowsky et al., 1987                 | 2 µg/ml  |
| Fibronectin                                    | Mouse   | Developmental Studies Hybridoma Bank | MT4             | Jackie D. Nace and Roy A. Tassava, 1995 | 2 µg/ml  |
| Beta-catenin                                   | Rabbit  | Sigma-Aldrich                        | C2206           |                                         | 1:500    |
| Integrin alpha 5 beta 1 (fibronectin receptor) | Mouse   | Developmental Studies Hybridoma Bank | P8D4            | 9/26/16                                 | 2 µg/ml  |
| Integrin beta 1 (CD29)                         | Mouse   | Developmental Studies Hybridoma Bank | 8C8             | 3/14/13                                 | 2 µg/ml  |
| Snai1                                          | Mouse   | Santa Cruz Biotechnology             | sc271977        | E2716                                   | 1:100    |
| Snai1                                          | Mouse   | St John's Laboratory                 | STJ95716        |                                         | 2 µg/ml  |
| Zeb1                                           | Mouse   | Novus Biologicals                    | 2A8A6           | NBP2-23484SS A-1                        | 1:100    |
| Sox2                                           | Mouse   | Santa Cruz                           | sc-365823       | E2716                                   | 1:100    |
| Cardiac troponin T                             | Mouse   | Developmental Studies Hybridoma Bank | CT3             | Dagle et al., 2003                      | 2 µg/ml  |
| STAT3                                          | Mouse   | Developmental Studies Hybridoma Bank | PCRP-STAT3-2F12 | 11/5/15                                 | 2 µg/ml  |
| Vimentin                                       | Mouse   | Developmental Studies Hybridoma Bank | 14h7            | Joseph A. Dent, 1989.                   | 1 µg/ml  |
| alpha-smooth muscle actin                      | Mouse   | Sigma-Aldrich                        | A2547           | Validate by staining in testis section  | 1:400    |
| Phalloidin (F-actin)                           |         | Thermo Fisher Scientific             |                 | 1668974                                 | 1:100    |
| Sox9                                           | Rabbit  | Sigma-Aldrich                        | HPA001758       | Anwar El Jamil, 2008                    | 1:300    |
| Red fluorescence protein                       | Rabbit  | Evrogen                              | AB233           | 23301291014                             | 1:5000   |
| Red fluorescence protein                       | Mouse   | Thermo Fisher Scientific             | MA5-15257       | QB205317                                | 1:500    |
| Mouse IgG-Alexa Fluor®                         | Goat    | Thermo Fisher Scientific             | A11001          | 1664729                                 | 1:500    |

|                                       |      |                          |        |         |       |
|---------------------------------------|------|--------------------------|--------|---------|-------|
| 488 conjugate                         |      |                          |        |         |       |
| Rabbit IgG-Alexa Fluor® 594 conjugate | Goat | Thermo Fisher Scientific | A11012 | 1678830 | 1:500 |
| Mouse IgG-Alexa Fluor® 594 conjugate  | Goat | Thermo Fisher Scientific | A11032 | 419361  | 1:500 |
| Rabbit IgG-Alexa Fluor®488 conjugate  | Goat | Thermo Fisher Scientific | A11034 | 870976  | 1:500 |
